# Supplementary material for: All electrochemical fabrication of MoS2/graphene counter electrodes for efficient dye-sensitized solar cells
Source: Royal Society of Chemistry journal article supplement (doi:10.1039/c6ra02494g), 2016-01-01
Supplement: c6ra02494g2.pdf [file c6ra02494g2.pdf]

## Supporting Information

### All electrochemical fabrication of MoS<sub>2</sub>/graphene counter electrodes for efficient dye-sensitized solar cells

Shengli Li,<sup>‡a</sup> Huihua Min,<sup>‡b</sup> Feng Xu,<sup>\*ac</sup> Ling Tong,<sup>d</sup> Jing Chen,<sup>e</sup> Chongyang Zhu,<sup>a</sup> Litao Sun<sup>\*ac</sup>

---

<sup>a</sup>SEU-FEI Nano-Pico Center, Key Laboratory of MEMS of the Ministry of Education, Southeast University, Nanjing 210096, China

<sup>b</sup>Electron Microscope Laboratory, Nanjing Forestry University, Nanjing 210037, China

<sup>c</sup>Center for Advanced Materials and Manufacture, Joint Research Institute of Southeast University and Monash University, Suzhou 215123, China

<sup>d</sup>Jiangnan Graphene Research Institute, Changzhou 213149, China

<sup>e</sup>School of Electronic Science & Engineering, Southeast University, Nanjing 210096, China

\* Corresponding author. Tel.: +862583792632; fax: +86-25-83792939. *E-mail address*: fxu@seu.edu.cn (F. Xu); slt@seu.edu.cn (L. T. Sun).

<sup>‡</sup> These authors contributed equally.

## **Contents**

- 1. SEM images of graphene film on FTO substrate.**
- 2. Optical absorbance of solutions (alcohol) containing methylene blue.**
- 3. The method to compare the surface area of MoS<sub>2</sub>/graphene composite with MoS<sub>2</sub>.**

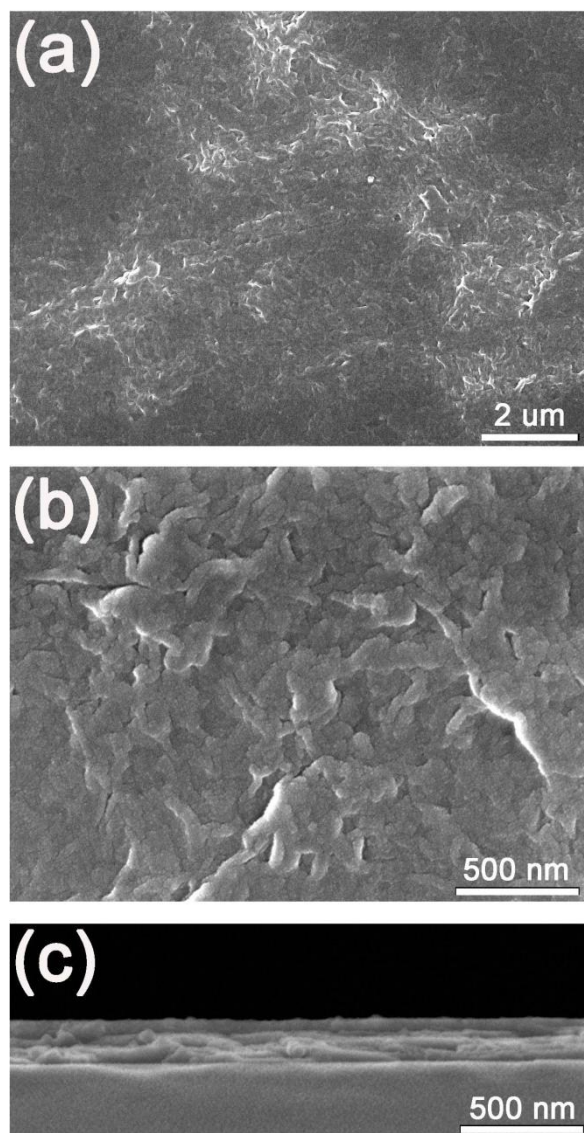

Fig. S1 (a, b) SEM images of graphene film on FTO substrate at different magnifications. (c) Cross-section SEM image of graphene film CE.

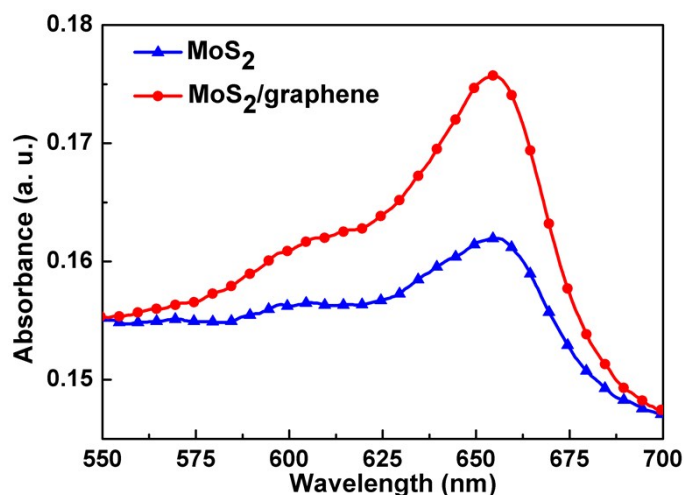

Fig. S2 Optical absorbance of solutions (alcohol) containing methylene blue detached from the MoS<sub>2</sub> CE and MoS<sub>2</sub>/graphene composite CE (both with 0.64 cm<sup>2</sup> area).

#### **The method to compare the surface area of MoS<sub>2</sub>/graphene composite with MoS<sub>2</sub>**

We used an indirect method to compare surface area of MoS<sub>2</sub>/graphene composite with MoS<sub>2</sub>. First, MoS<sub>2</sub> CE and MoS<sub>2</sub>/graphene composite CE with the same area of 0.64 cm<sup>2</sup> were immersed into the same methylene blue solution for two hours. Then, these two CEs were washed by alcohol. After that, they were ultrasonically dispersed for 60 min in 1 mL alcohol to detach the absorbed methylene blue. Finally, we tested the optical absorption spectrum of the alcohol solutions containing methylene blue detached from the MoS<sub>2</sub> CE and MoS<sub>2</sub>/graphene composite CE (Fig. S2†).

We compared the surface area of MoS<sub>2</sub> and MoS<sub>2</sub>/graphene CE by contrasting optical absorbance (Fig. S2†). As we can see that the optical absorption peak of solution containing methylene blue detached from MoS<sub>2</sub>/graphene composite is higher than that of solution containing methylene blue detached from MoS<sub>2</sub>, which means that the MoS<sub>2</sub>/graphene composite adsorbed more methylene blue than MoS<sub>2</sub>. The contrasting result indirectly proves that the MoS<sub>2</sub>/graphene composite CE owns a larger surface area than MoS<sub>2</sub> CE.
